# Supplementary material
Source: publisher figshare collection journal article supplement (https://tandf.figshare.com/ndownloader/files/43748849)
Supplement: Supplementary file 1 [file 43748849]

**Public Interest Statement**

This study investigates how women has been the most vulnerable to various kinds of attacks and insecurity. As it was noted that women in the North-eastern Nigeria, suffers from various kinds of insurgency, such as rape, forced marriage, kidnap and destruction of properties. Despite the various trauma and challenges being encourted by women in the North-eastern region of Nigeria, women participation in counter-insurgency remains inadequate. With a particular reference to the United Nations (UN) Security Council Resolution 1325, urging all actors to increase the participation of women and incorporate gender perspectives in UN peace and security efforts. The study stated that women should be engaged in fight against insurgency in the North-eastern region of Nigeria. The study also suggested the need to translate the United Nations (UN) Security Council Resolution 1325 into Hausa and Kanuri languages the same way it has been translated to over 100 languages.
